# Supplementary material for: A ratiometric fluorescent sensor for detection of metformin based on terbium–1,10-phenanthroline–nitrogen-doped-graphene quantum dots
Source: Royal Society of Chemistry journal article supplement (doi:10.1039/d2ra02611b), 2022-01-01
Supplement: d2ra02611b1.pdf [file d2ra02611b1.pdf]

## Supplementary

### **A ratiometric fluorescence sensor for detection of metformin based on terbium-1, 10-phenanthroline-nitrogen-doped-graphene quantum dots**

Masoud Gazizadeh<sup>a</sup>, Gholamreza Dehghan<sup>a,\*</sup>, Jafar Soleymani<sup>b,\*</sup>

<sup>a</sup> Department of Biology, Faculty of Natural Sciences, University of Tabriz, Tabriz, Iran

<sup>b</sup> Pharmaceutical Analysis Research Center, Tabriz University of Medical Sciences, Tabriz, Iran

\*Corresponding Authors addresses:

**Gholamreza Dehghan, PhD.** Email: [gdehghan@tabrizu.ac.ir](mailto:gdehghan@tabrizu.ac.ir), Tel:+9841 3339 2739.

**Jafar Soleymani, PhD.** Email: [jsoleymanii@gmail.com](mailto:jsoleymanii@gmail.com) and [soleymanij@tbzmed.ac.ir](mailto:soleymanij@tbzmed.ac.ir), Tel:  
+9841 3337 5365.

## Figures

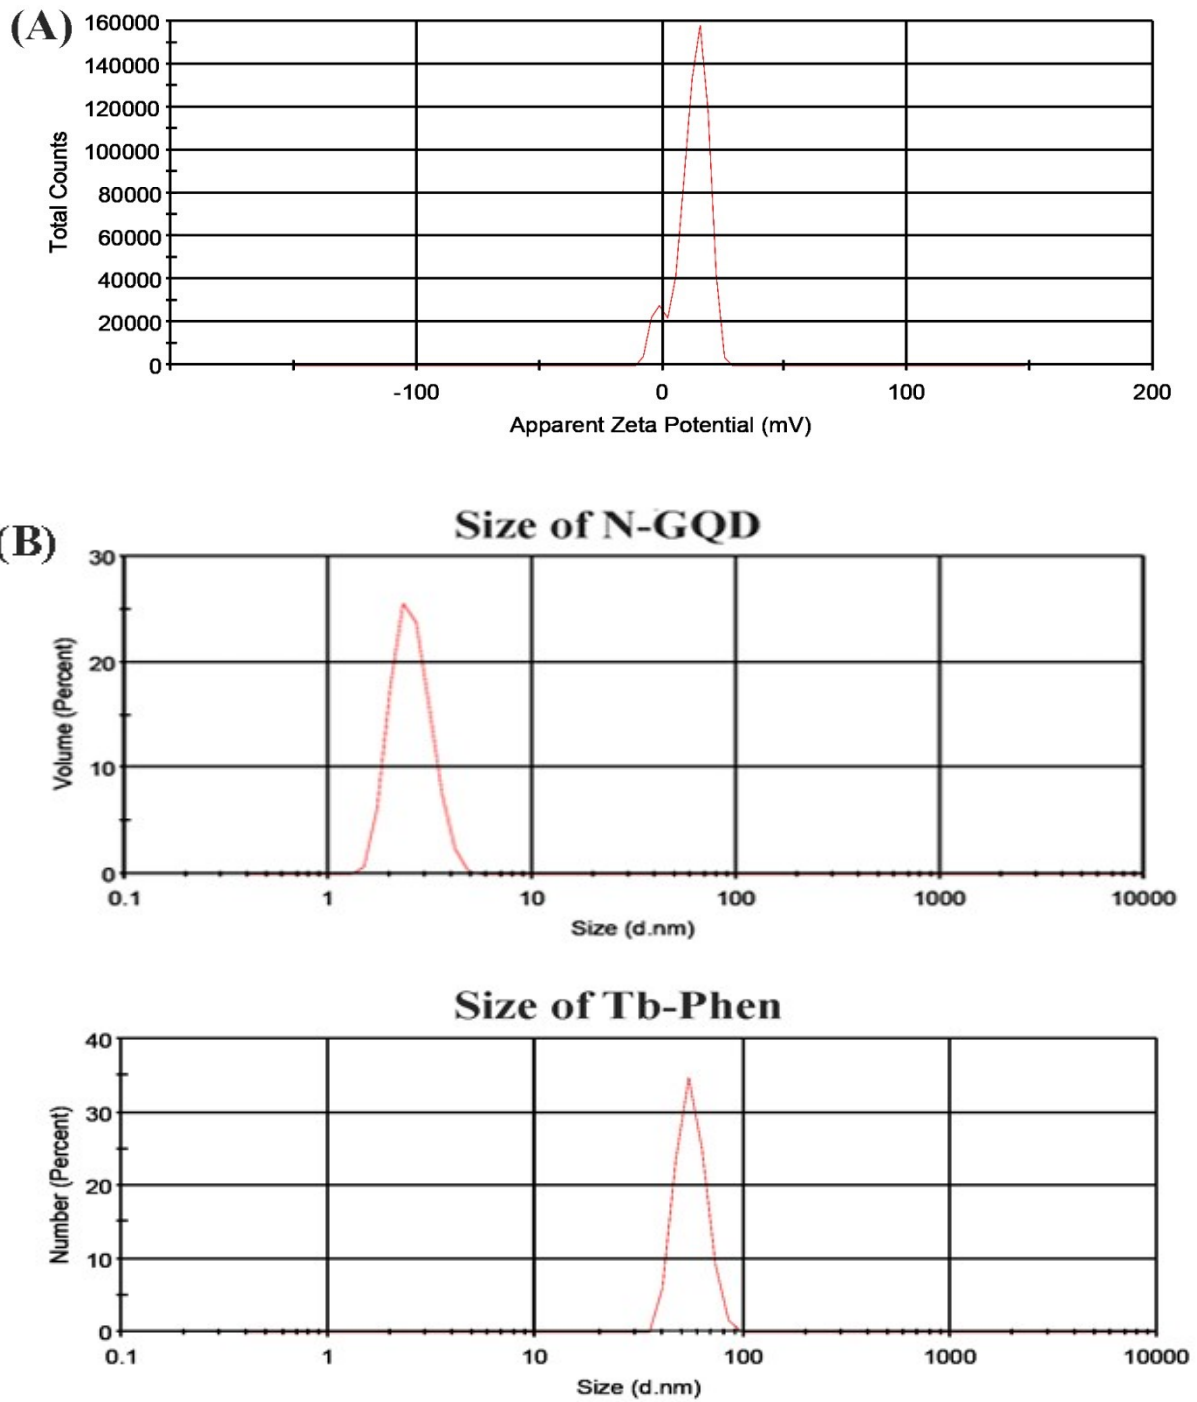

Fig. 1S. (A) Zeta analysis and (B) DLS analysis of particle size of N-GQDs/Tb-Phen NPs.

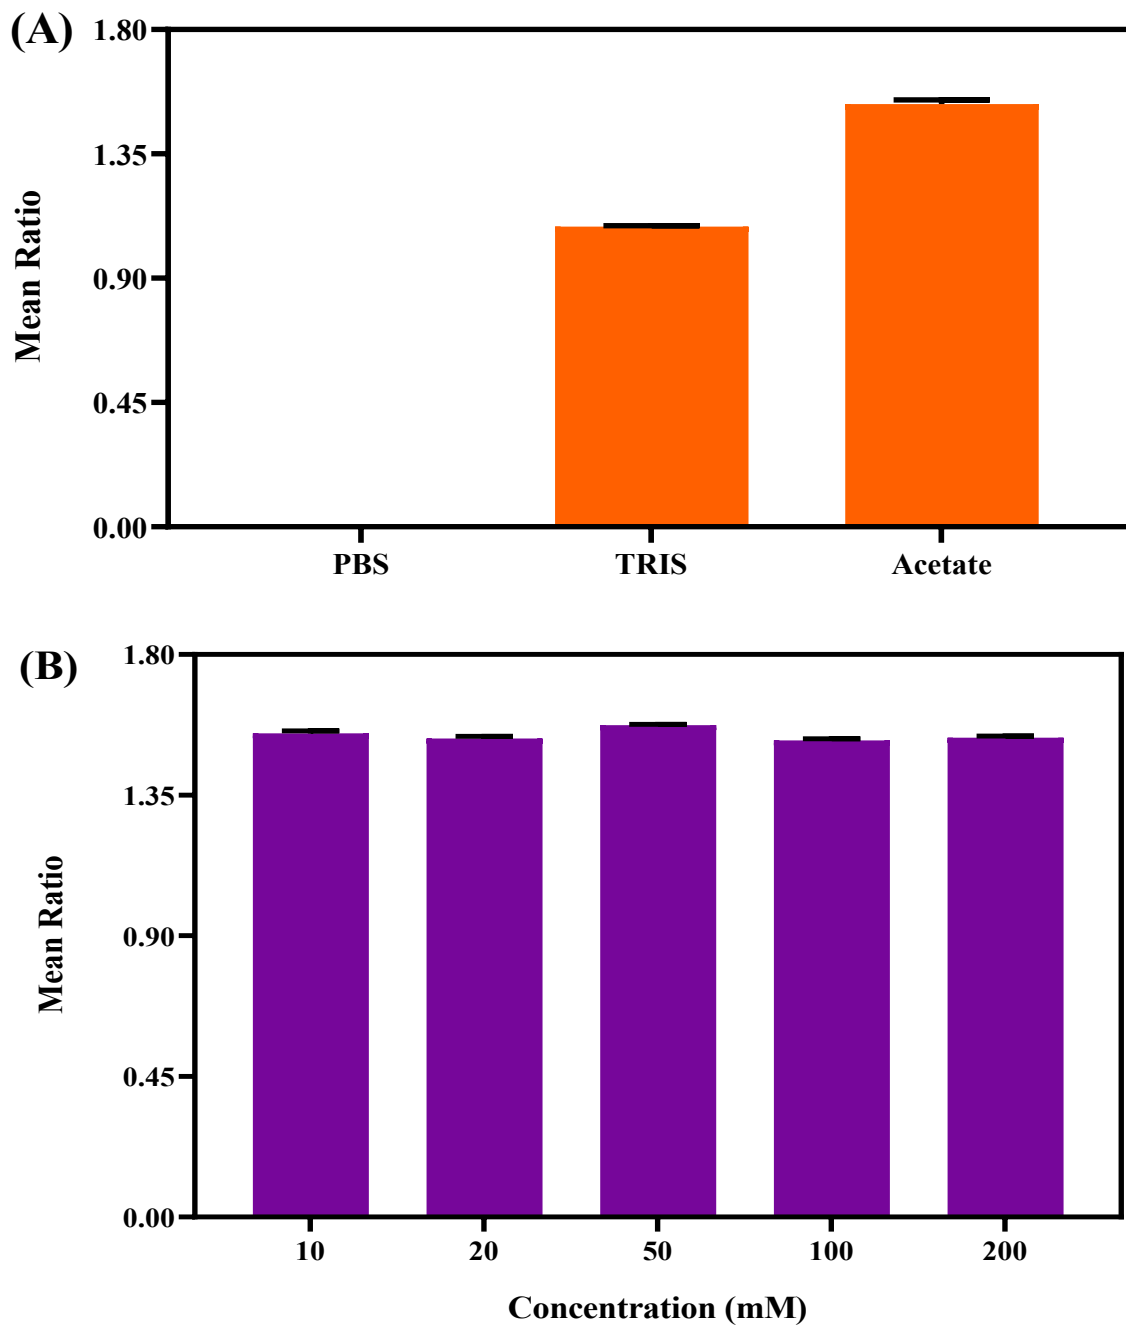

**Fig. 2S.** (A) The effect of buffer type and (B) buffer concentration on the response of N-GQDs/Tb-Phen NPs sensor in the presence of  $1.0 \times 10^{-6}$  M of MTF.

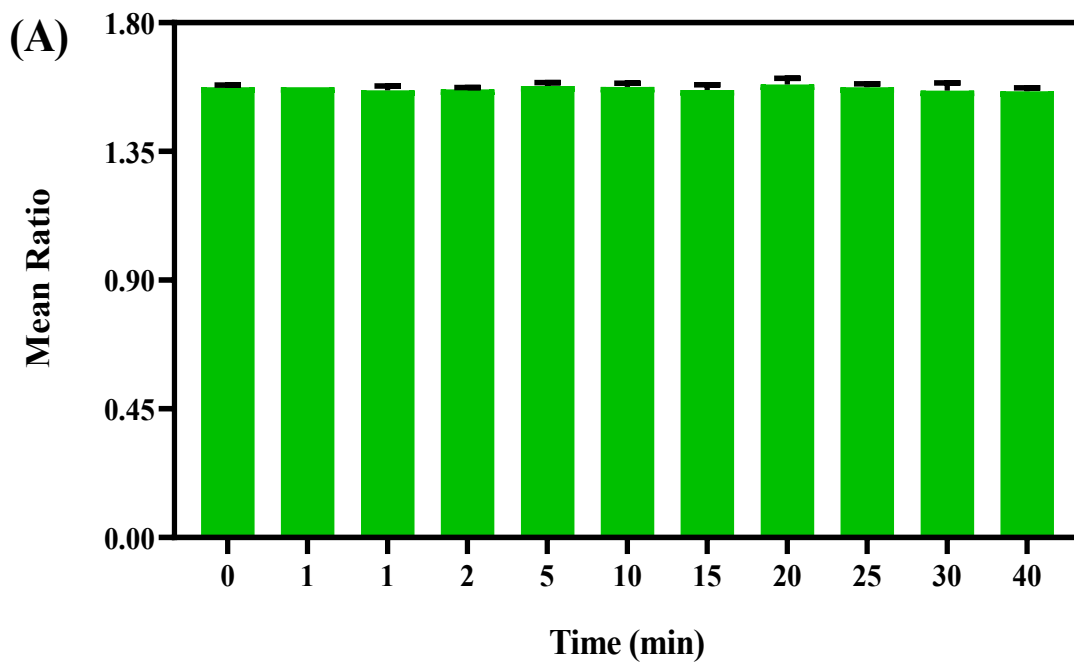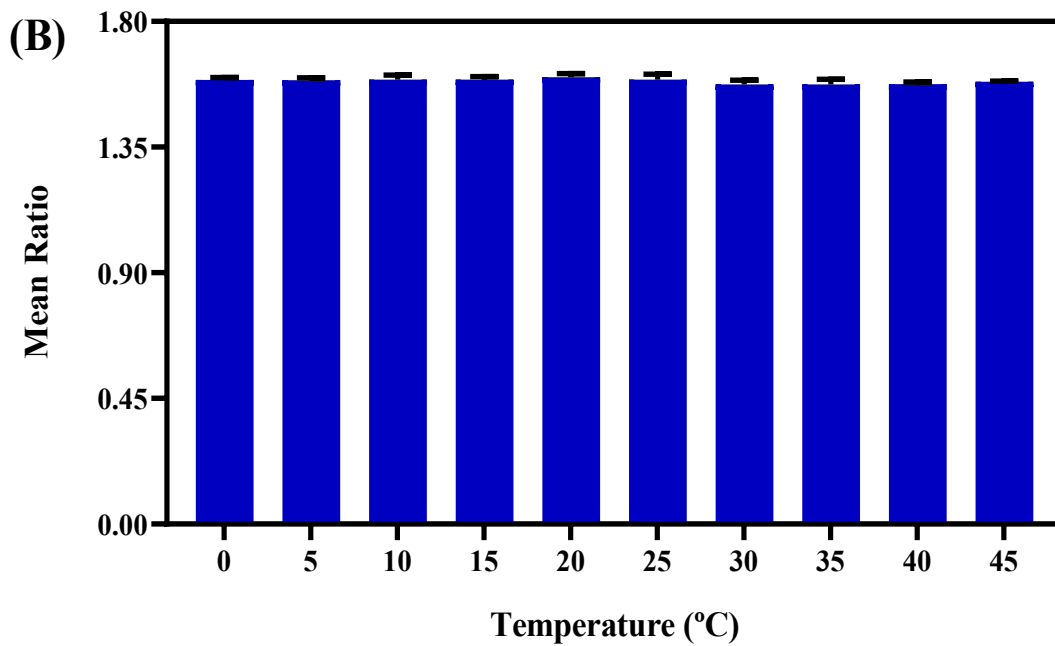

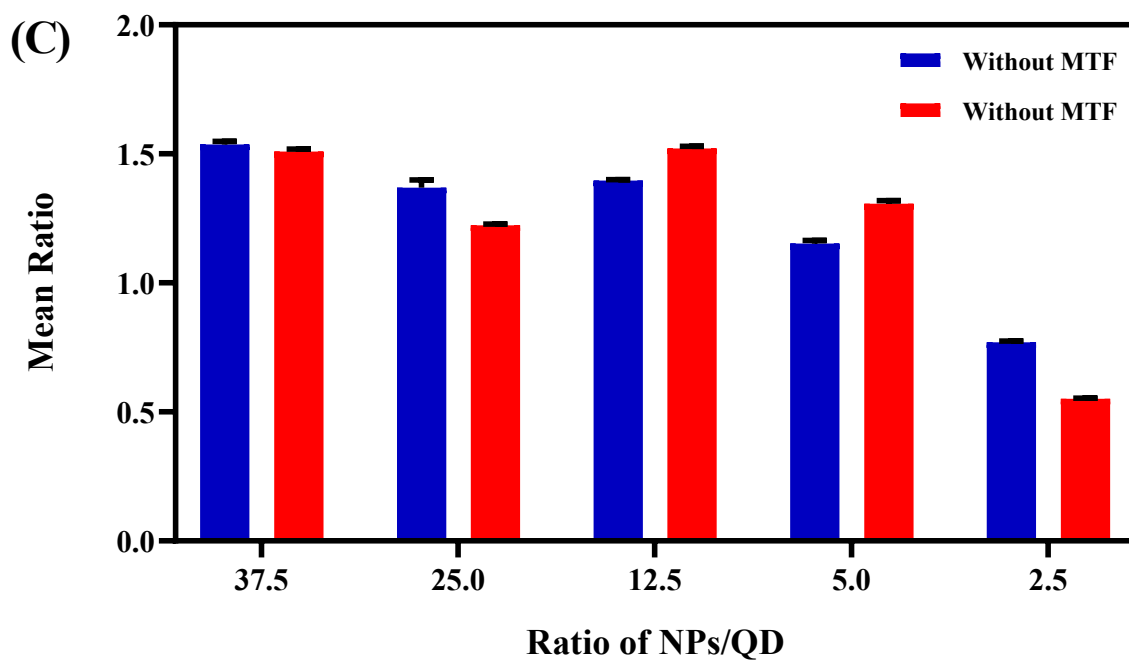

Fig. 3S. Effect of (A) incubation time, (B) temperature on the fluorescence ratio of N-GQDs/Tb-Phen NPs sensor in the presence of  $1.0 \times 10^{-6}$  M of MTF, in acetate buffer solution (0.05 M), and (C) the concentration ratio of N-GQDs to Tb-Phen NPs for the preparation of N-GQDs/Tb-Phen NPs in the absence and presence of MTF ( $1.0 \times 10^{-6}$  M) in acetate buffer solution (0.05 M). Conditions: pH 7.5 and 20 °C.

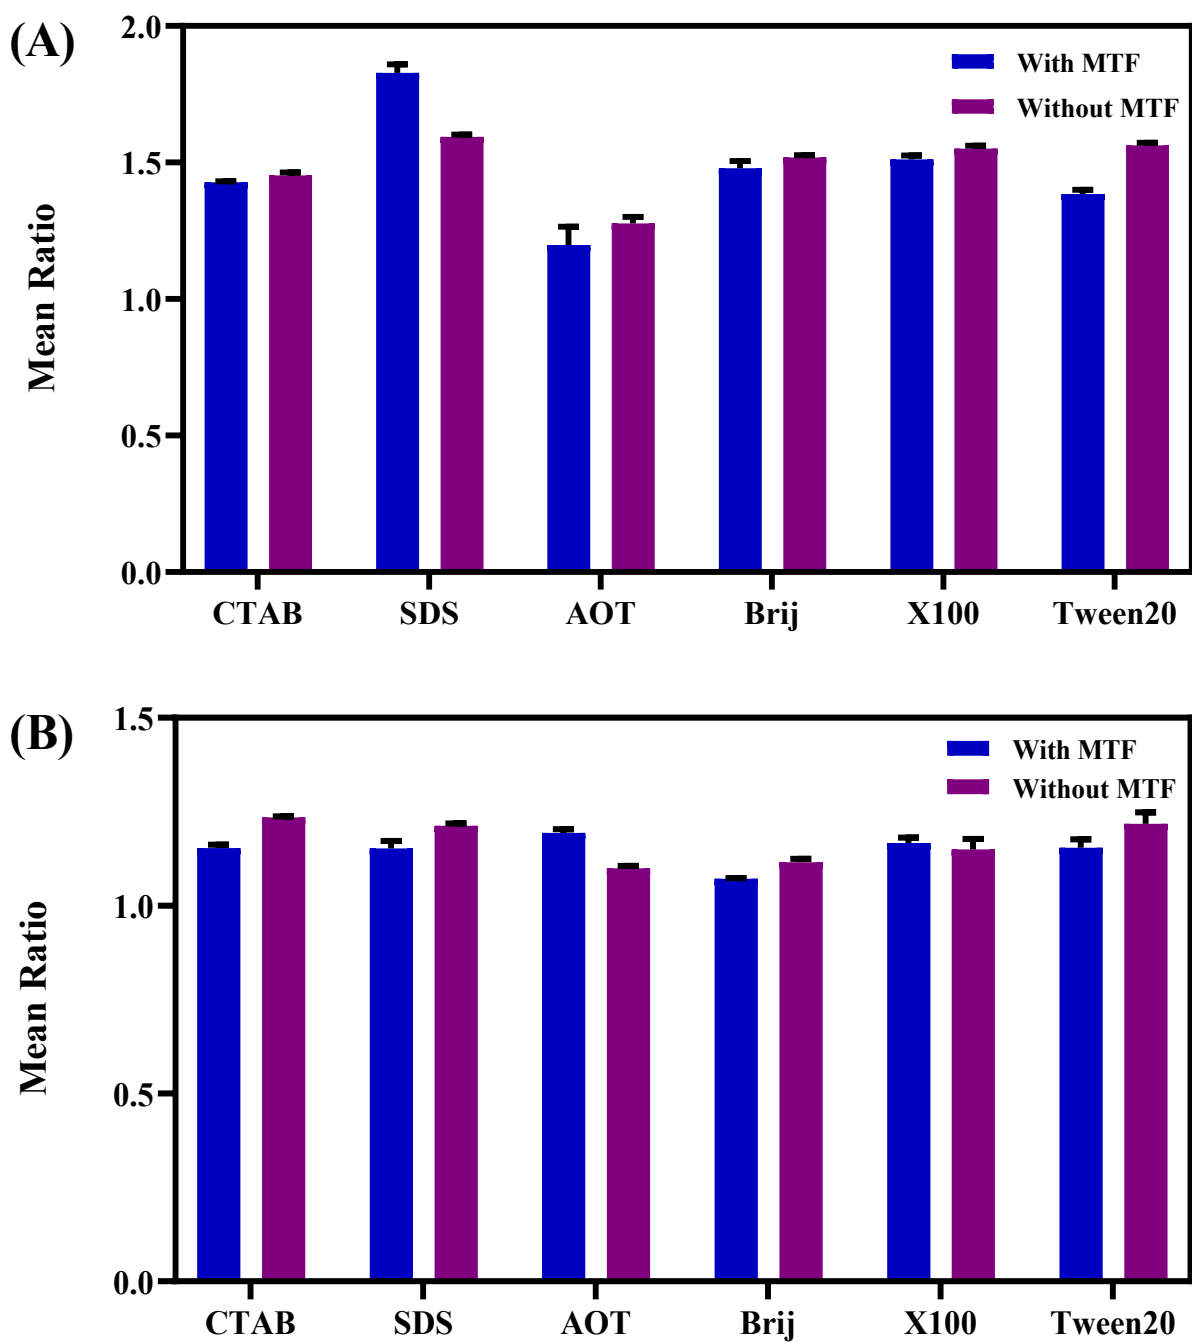

**Fig. 4S.** (A) Fluorescence ratio changes of N-GQDs/Tb-Phen NPs sensor in the presence of various surfactants without and with MTF ( $1.0 \times 10^{-6}$  M) at CMC concentration, and (B) lower CMC concentration.

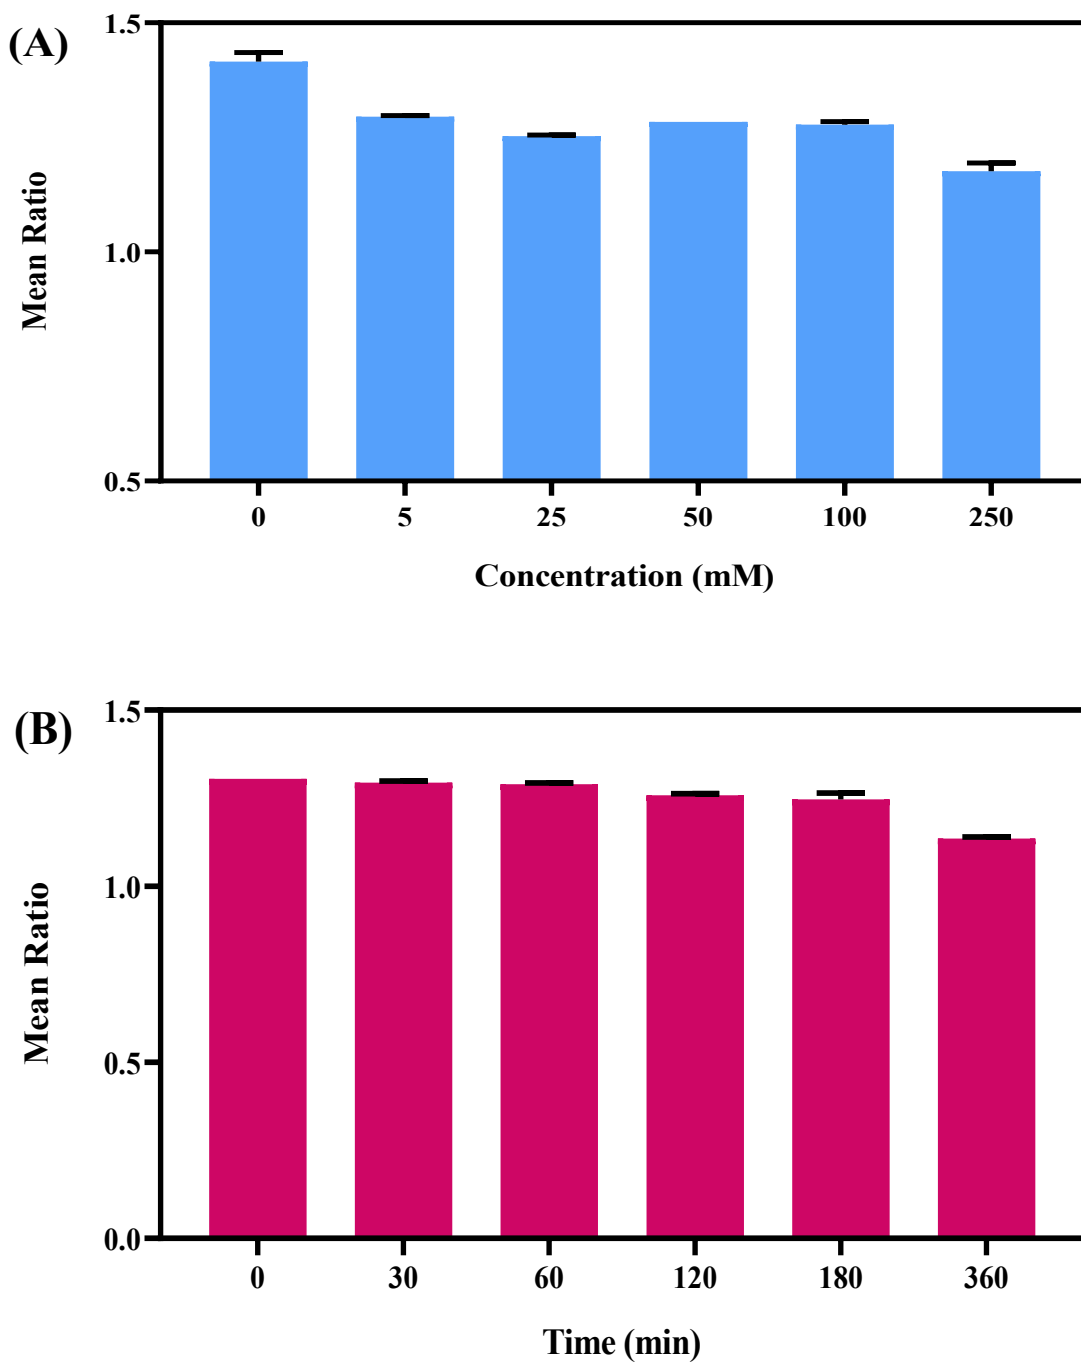

**Fig. 5S.** (A) The effects of UV light and (B) salt on the fluorescence ratio changes of N-GQDs/Tb-Phen NPs sensor in the presence of  $1.0 \times 10^{-6}$  M MTF, in acetate buffer solution (0.05 M).
